# Supplementary material
Source: PubMed Central journal article supplement (PMC6818160)
Supplement: mmc1.pdf [file mmc1.pdf]

**Biophysical Journal, Volume 117**

**Supplemental Information**

**Probing the Basis of  $\alpha$ -Synuclein Aggregation by Comparing Simulations to Single-Molecule Experiments**

**Cassandra D.M. Churchill, Mark A. Healey, Jordane Preto, Jack A. Tuszynski, and Michael T. Woodside**

## Supplementary Methods:

The terms of the interaction potential in Eq. 2,  $E = E_{\text{loc}} + E_{\text{ev}} + E_{\text{hb}} + E_{\text{hp}}$ , are described in detail in Refs. 70 and 71. The equations describing these terms are given below.

The first term, describing electrostatic effects, is given by

$$E_{\text{loc}} = \kappa_{\text{loc}} \sum_I \left( \sum_{ij} \frac{q_i q_j}{r_{ij}^{(I)}} \right), \quad (\text{S1})$$

where  $q_{ij}$  are the partial charges of the backbone NH and C'O groups in a given amino acid  $I$ ,  $r_{ij}$  is the distance between the partial charges,  $\kappa_{\text{loc}} = 100$  is a constant related to the dielectric constant, and the external sum is over all amino acids.

The second term, describing excluded-volume effects, is given by

$$E_{\text{ev}} = \kappa_{\text{ev}} \sum_{i < j} \left[ \frac{\lambda_{ij} (\sigma_i + \sigma_j)}{r_{ij}} \right]^{12}, \quad (\text{S2})$$

where the summation is over all pairs of atoms  $(i, j)$ ,  $r_{ij}$  is the distance between atoms,  $\sigma_i$  are constants differing for each atom,  $\lambda_{ij}$  is 0.75 for all pairs except those with 3 covalent bonds where it is 1, and  $\kappa_{\text{loc}} = 0.1$  is a constant.

The third term, describing hydrogen bond energies, is given by

$$E_{\text{hb}} = \varepsilon_{\text{hb}}^{(1)} \sum_{\text{bb-bb}} u(r_{ij}) v(\alpha_{ij}, \beta_{ij}) + \varepsilon_{\text{hb}}^{(2)} \sum_{\text{sc-bb}} u(r_{ij}) v(\alpha_{ij}, \beta_{ij}), \text{ with} \\ u(r) = 5 \left( \frac{\sigma_{\text{hb}}}{r} \right)^{12} - 6 \left( \frac{\sigma_{\text{hb}}}{r} \right)^{10} \text{ and } v(r) = \begin{cases} (\cos \alpha \cos \beta)^{1/2}, \alpha, \beta > 90^\circ \\ 0, \alpha, \beta \leq 90^\circ \end{cases}. \quad (\text{S3})$$

Here, only hydrogen bonds between NH and CO groups are included,  $r_{ij}$  is the O–H distance,  $\alpha_{ij}$  is the NHO bond angle,  $\beta_{ij}$  is the HOC bond angle,  $\varepsilon_{\text{hb}}$  and  $\sigma_{\text{hb}}$  are constants, the first sum is taken over backbone-backbone interactions, and the second sum is taken over sidechain-backbone interactions.

The fourth term, describing an effective hydrophobic interaction between non-polar sidechains, is given by

$$E_{\text{hp}} = \varepsilon_{\text{hp}} \sum_{I < J} M_{IJ} C_{IJ}, \quad (\text{S4})$$

where the sum is taken over all pairs of non-polar sidechains,  $\varepsilon_{\text{hp}}$  is a constant,  $M_{IJ}$  is a matrix of hydrophobicity constants, and  $C_{IJ}$  is a measure of the extent of contact between sidechains calculated as described in Refs. 70 and 71.

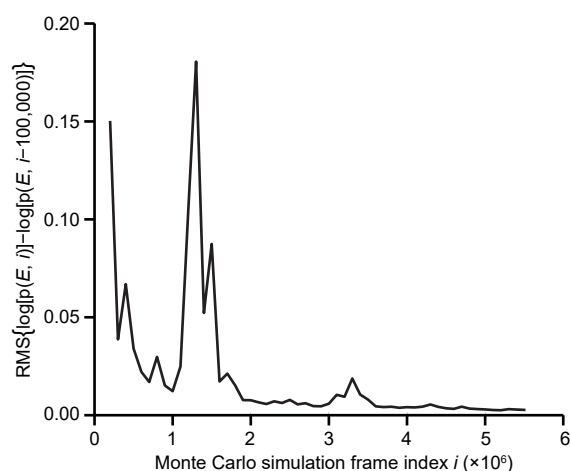

**Figure S1: Convergence of structural ensemble in Monte Carlo simulations.** Convergence of the ensemble was tested by extracting the energy distribution  $p(E)$  after every 100,000 steps in the simulation and then calculating the rms difference between the logarithm of successive energy distributions as the simulation progressed. This difference became close to 0 above 5 million steps, indicating convergence.

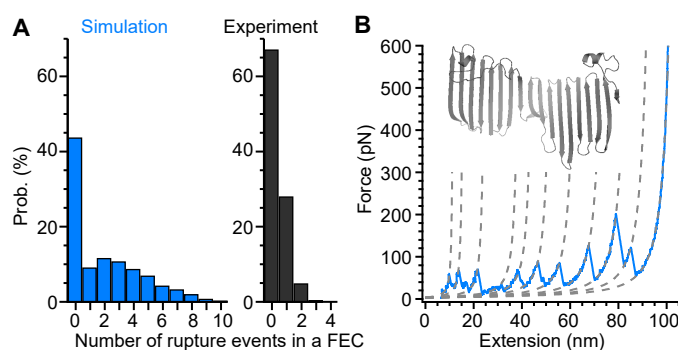

**Figure S2: Rupture events in force-extension curves.** (A) A larger number of rupture events is seen in simulated FECs (blue) compared to experimental FECs (black). (B) A simulated FEC showing 10 discrete rupture events during unfolding of an ordered structure containing 65%  $\beta$ -sheet content. Each branch of the FEC was fit to a WLC (dashed lines).

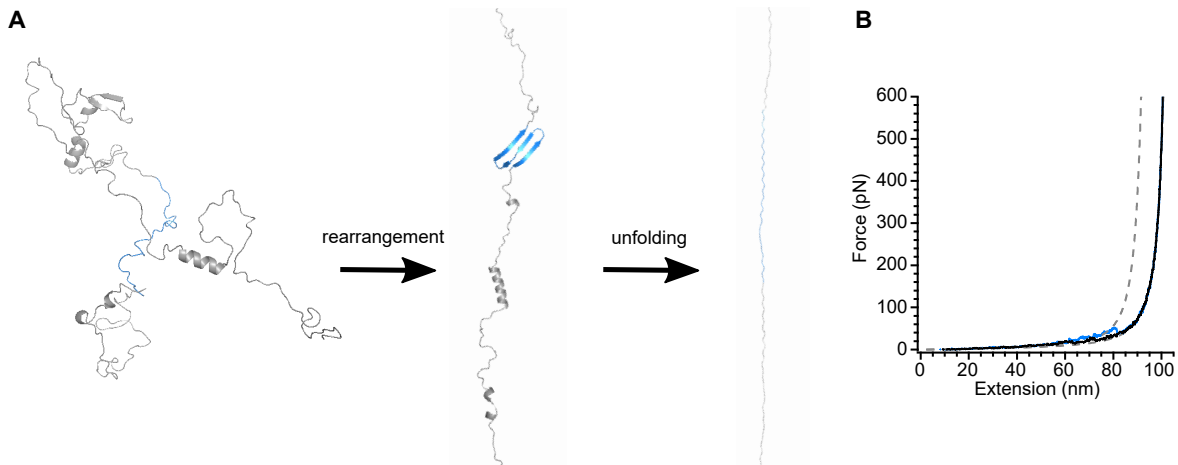

**Figure S3: Structural rearrangement during simulated pulling.** (A) Rarely, simulated pulling of an  $\alpha$ -synuclein dimer with little secondary structure rearranged during pulling to form a force-resistant metastable  $\beta$ -sheet (blue). (B) FECs resulting from pulling such structures typically show no discrete rupture events (blue), but occasionally a replicate features a low-force rupture (blue) corresponding to the unfolding of the newly-formed  $\beta$ -sheet (as in A). Dashed line: WLC fit.

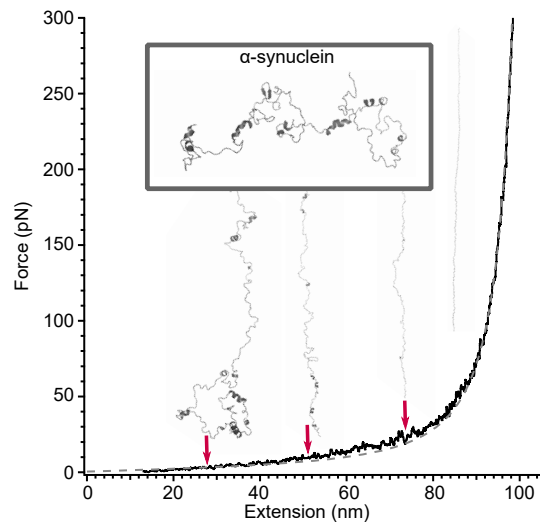

**Figure S4: Non-cooperative unfolding of helical conformers.** A simulated FEC for an  $\alpha$ -synuclein dimer with 24%  $\alpha$ -helical character shows unfolding that occurs via continuous, non-cooperative transitions, producing a FEC without discrete rupture event. The structures of the dimer are illustrated at various point along the unfolding trajectory.

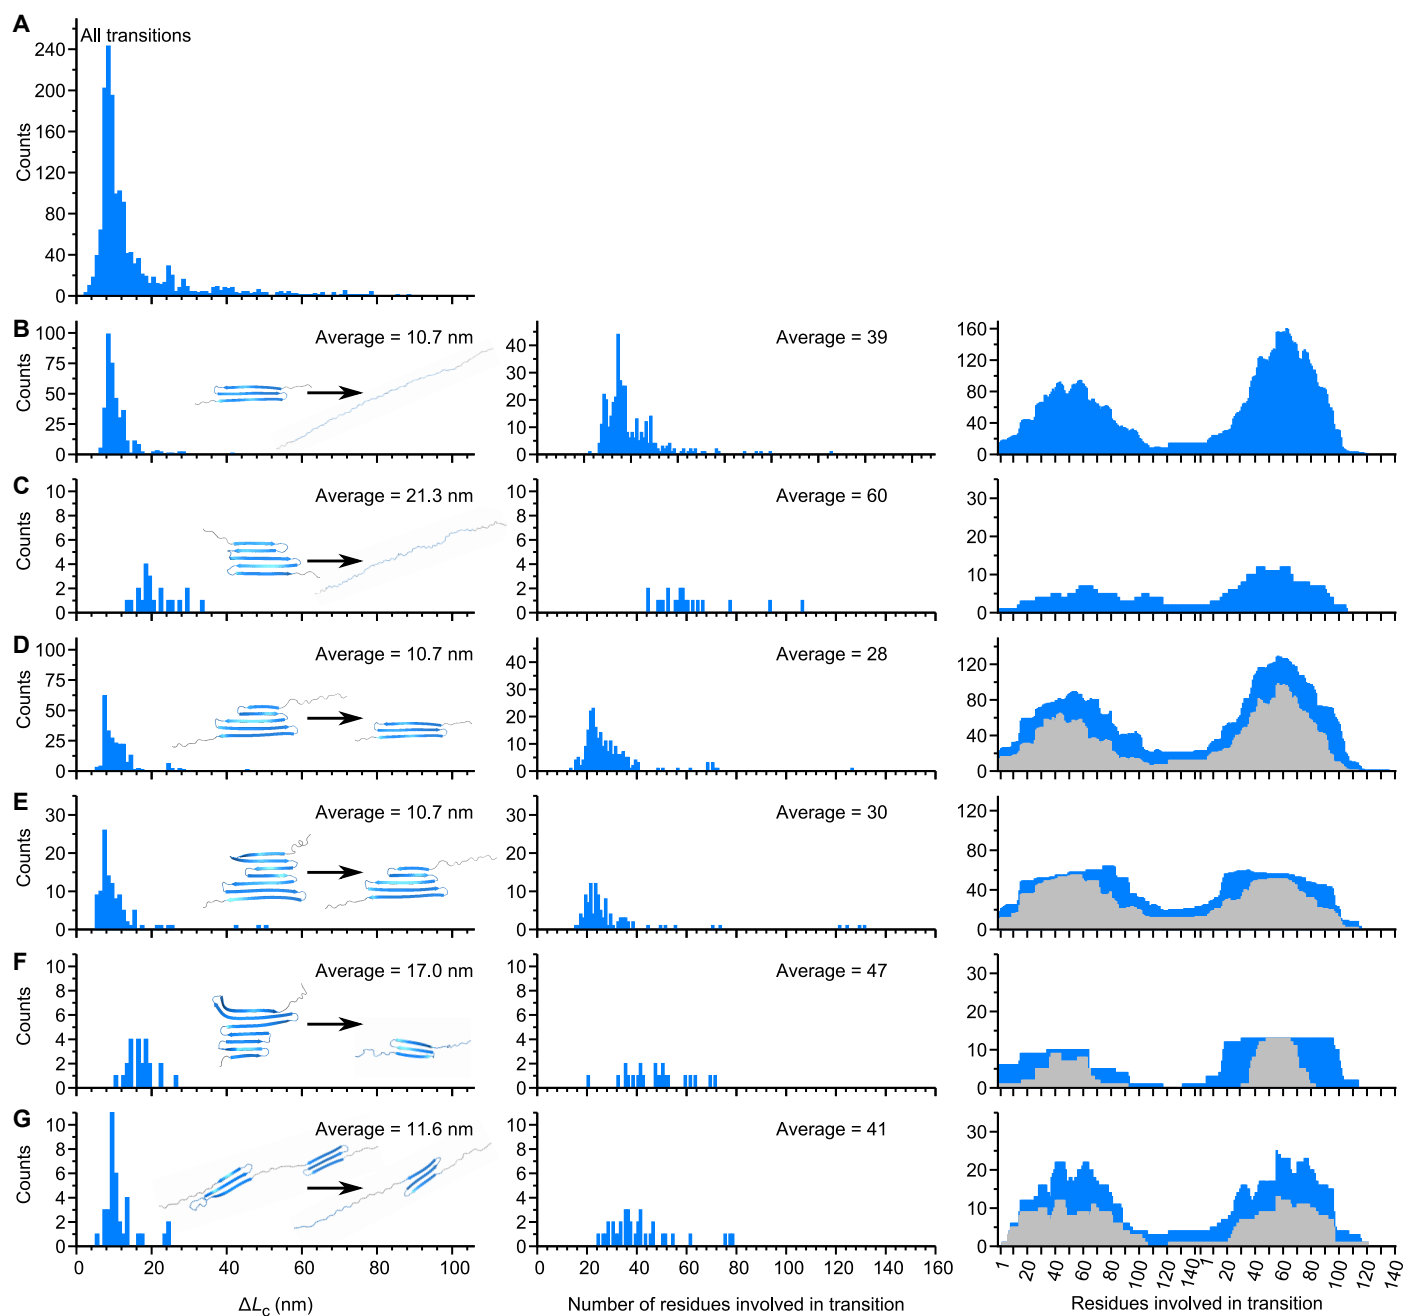

**Figure S5: Analysis of select structural transitions.** Left column:  $L_c$  distributions from (A) all simulations and (B–G) select structural transitions for unfolding anti-parallel  $\beta$ -strands (structures illustrated in insets). Center column: The number of residues that lost secondary structure during the unfolding event. Right column: The residues with secondary structure before (blue) and after (grey) the structural transition.

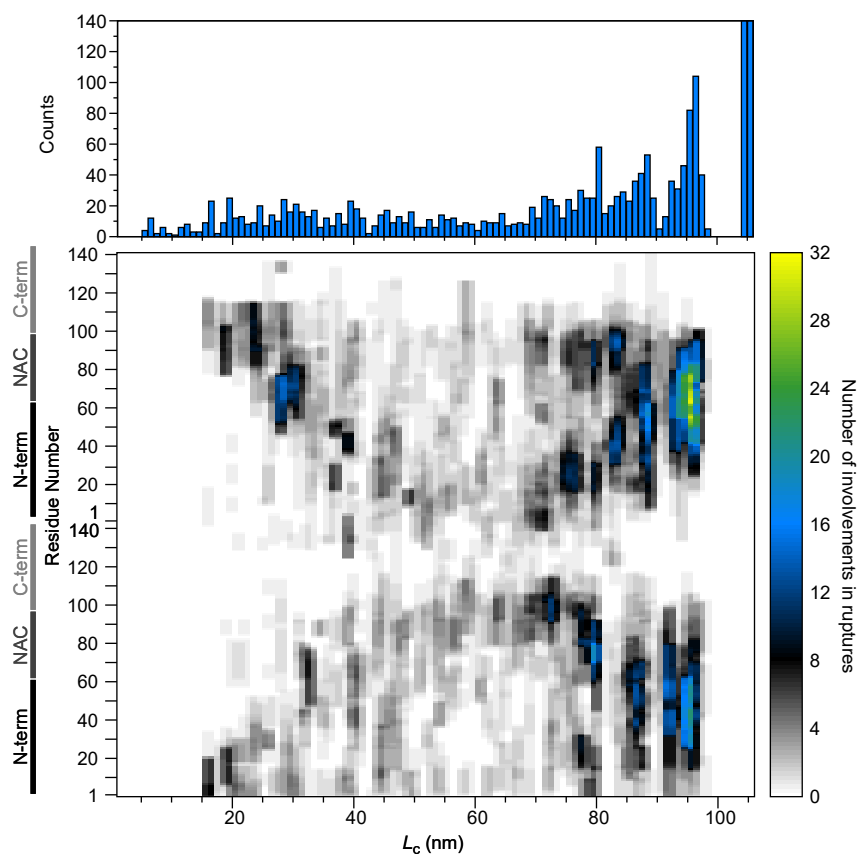

**Figure S6: Map of residues involved in rupture events.** A contour plot of the residues that lose secondary structure during rupture events at each  $L_c$  value shows that the N-terminal and NAC regions are more likely to form secondary structures generating rupture events whereas the C termini and the linker region are less likely to do so. Left: schematic of protein domains. Top: Histogram of  $L_c$  for all rupture events in FECs.

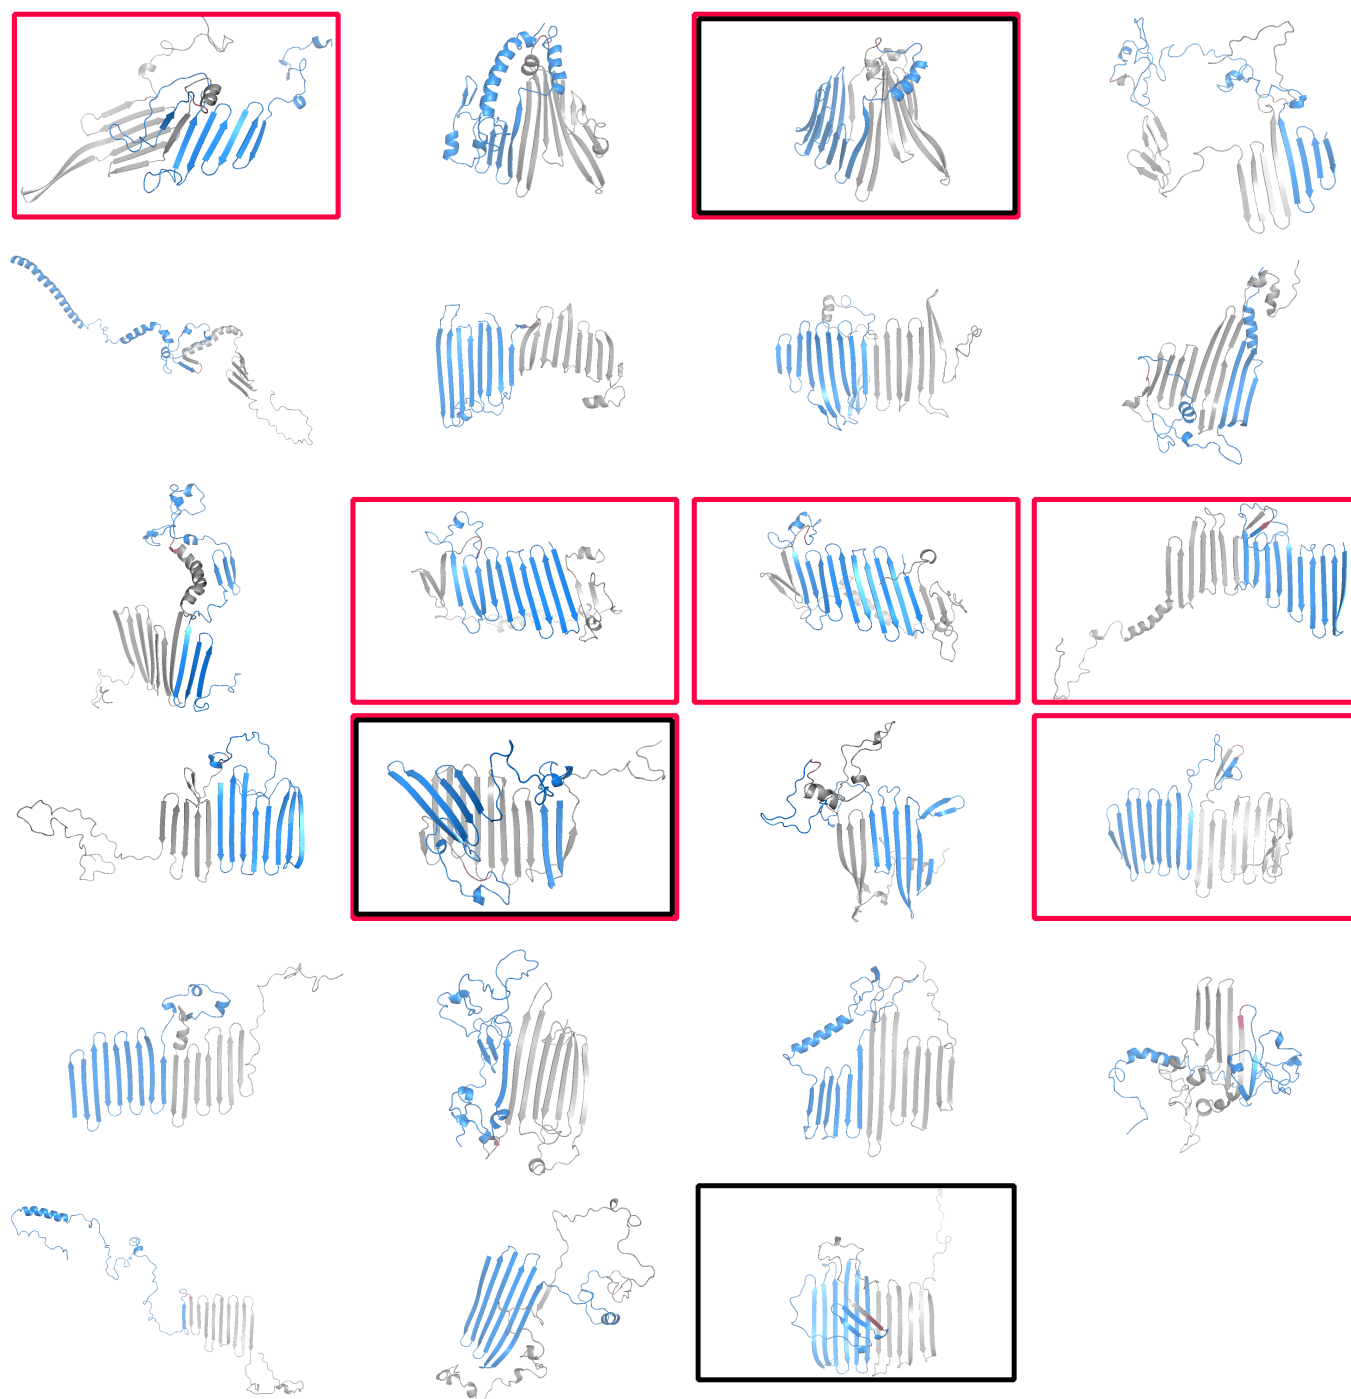

**Figure S7:** Structures containing interfaces between domain 1 (blue) and domain 2 (grey), with the linker region indicated in pink. The interfaces identified in our work primarily feature edge-to-edge interactions between sheets in different domains. Some structures contain two edge-to-edge interfaces (red box), while other structures have an interface formed face-on between sheets from each domain (black box).

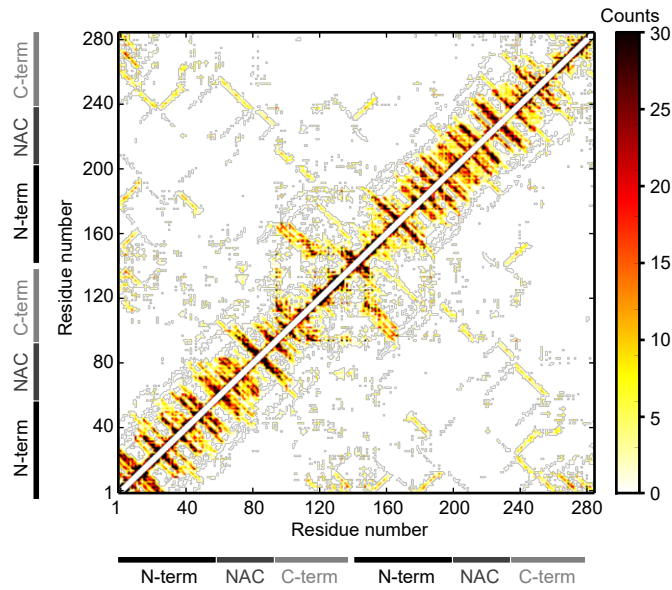

**Figure S8: Full contact map for dimer structures.** Contact map built from all 266 pulling trajectories showing discrete ruptures at the interface, showing all contacts (interfacial and non-interfacial).

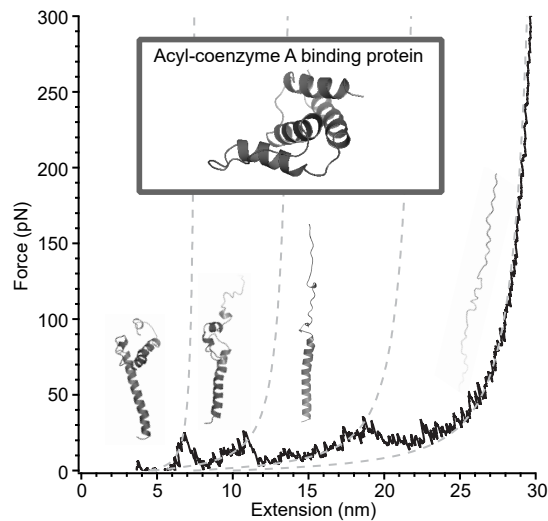

**Figure S9: Simulated pulling of an  $\alpha$ -helical protein.** Simulated FECs of the unfolding of acyl-coenzyme A binding protein (ABP) obtained using the same simulation conditions as for  $\alpha$ -synuclein dimers show discrete rupture events, in contrast to the non-cooperative unfolding seen in helical conformers of  $\alpha$ -synuclein dimers. Unfolding transitions can be fit by WLCs (dashed lines), and the structures corresponding to each branch of the FEC are illustrated.
